# Supplementary material for: Genome-Wide Transcription and Functional Analyses Reveal Heterogeneous Molecular Mechanisms Driving Pyrethroids Resistance in the Major Malaria Vector Anopheles funestus Across Africa
Source: PubMed Central journal article supplement (PMC5473761; doi:10.1534/g3.117.040147), 2017-04-19
Supplement: 1819FileS1.pdf [file 1819FileS1.pdf]

Table S1: List of primers used in the study

|                                                                 | Forward primer                                                                                   | Reverse primer                                                                                        | Expected size (bp) |
|-----------------------------------------------------------------|--------------------------------------------------------------------------------------------------|-------------------------------------------------------------------------------------------------------|--------------------|
| <b>qRT-PCR primers</b>                                          |                                                                                                  |                                                                                                       |                    |
| <i>GSTe2</i>                                                    | GTTTGAAGCAGTTGCCATACTACGAGG                                                                      | TCAAGCTTTAGCATTTCCTCCTTTTTGG<br>C                                                                     | 101                |
| <i>CYP6P9a</i>                                                  | CAGCGCGTACACCAGATTGTGTAA                                                                         | TCA CAA TTT TTC CAC CTT CAA GTA<br>ATT ACC CGC                                                        | 92                 |
| <i>CYP6P9b</i>                                                  | CAGCGCGTACACCAGATTGTGTAA                                                                         | TTA CAC CTT TTC TAC CTT CAA GTA<br>ATT ACC CGC                                                        | 97                 |
| <i>CYP9J11</i>                                                  | CAAATTTAAAGAGTGCGCTAGG                                                                           | GTAGATGGTGCCAAGGATGG                                                                                  | 115                |
| <i>Actin</i>                                                    | TTAAACCCAAAAGCCAATCG                                                                             | ACCGGATGCATACAGTGACA                                                                                  | 111                |
| <i>RSP7</i>                                                     | GTGTTTCGGTTCCAAGGTGAT                                                                            | TCCGAGTTCATTTCAGCTC                                                                                   | 98                 |
| <b>Primers for functional analysis</b>                          |                                                                                                  |                                                                                                       |                    |
| <i>GSTe2</i>                                                    | <b>AGATCT</b> ATGACCAAGCTAGTTCTGTAC<br>ACGCT<br>GAATTC <b>CATATG</b> ACCAAGCTAGTTCTG<br>TACACGCT | <b>TCTAGA</b> TCAAGCTTTAGCATTTCCTCCT<br>TTTTGGC<br>CCG <b>CTCGAG</b> TCAAGCTTTAGCATTTC<br>TCCTTTTTGGC |                    |
| <i>CYP9J11</i>                                                  |                                                                                                  |                                                                                                       |                    |
| <i>CYP9J11Full</i>                                              | ATG GAG ATC GAT TTG ATG GTT CT                                                                   | TTA CAT ACT AAC TTC GTT ATC TTT CTT TCT<br>AGG                                                        |                    |
| <i>ompA+2F</i>                                                  | <b>GGAATTC</b> <b>CATATG</b> AAAAAAGACAGCTA<br>TCGCG                                             |                                                                                                       |                    |
| <i>ompA+2CYP9J11_F</i>                                          | AACCATCAAATCGATCTCCATCGGAGC<br>GGCCTGCGCTACGGTAGCGAA                                             |                                                                                                       |                    |
| <i>ompA+2CYP9J11_R</i>                                          |                                                                                                  | <b>TCTAGATCTAGATTACATACTAACTTCGTTATCTT</b><br>TC                                                      |                    |
| <b>Primers used for amplification for polymorphism analysis</b> |                                                                                                  |                                                                                                       |                    |
| <i>CYP6P9a</i>                                                  | ATCCCTAACTATTTAAAGGCAAT                                                                          | TCACAATTTTTCCACCTTCAAGTAATTACCCGC                                                                     | 2.2                |
| <i>CYP6P9b</i>                                                  | CATACTATAATACTAGACGCG                                                                            | TTACACTTTTCTACCTTCAAGTAATTACCCGC                                                                      | 1.8                |

In red is restriction site for *Bgl*III; in green is for *Xba*I; blue is for *Nde*I; purple is for *Xho*I; *Eco*RI is dark brown.

**Table S2: Detoxification genes commonly up-regulated only in two countries between Uganda (UG), Malawi (MAL) and Benin (BN)**

| Probe Name             |                    |               | UG   | MAL | BN   | Description                   |
|------------------------|--------------------|---------------|------|-----|------|-------------------------------|
| CUST_13921_PI426302897 | Afun013921         | AGAP006709-PA | 49.5 |     | 27.4 | chymotrypsin 1                |
| CUST_11037_PI426302897 | Afun011037         | AGAP003581-PA | 8.0  |     | 13.1 | alcohol dehydrogenase         |
| CUST_12461_PI426302897 | Afun012461         | AGAP000288-PA | 6.8  |     | 10.5 | alcohol dehydrogenase         |
| CUST_6368_PI426302897  | Afun006368         | AGAP003785-PB | 6.4  |     | 3.2  | glucose dehydrogenase         |
| CUST_15244_PI426302897 | Afun015244         | AGAP000820-PA | 5.9  |     | 4.1  | cuticular protein rr-1 family |
| CUST_13481_PI426302897 | Afun013481 (GSTe1) | AGAP009195-PA | 5.6  |     | 2.3  | glutathione-s-transferase gst |
| CUST_8354_PI426302897  | Afun008354 (GSTD3) | AGAP004382-PA | 5.1  |     | 4.3  | glutathione transferase       |
| CUST_3731_PI406199772  | CD577517.1         |               | 4.7  |     | 2.1  | cuticle protein               |
| CUST_1088_PI406199772  | EE590086.1         |               | 4.5  |     | 2.6  | d7-related 1 protein          |
| CUST_15331_PI426302897 | Afun015331         | AGAP001039-PB | 3.9  |     | 29.4 | cytochrome p450 307a1         |
| CUST_3736_PI406199772  | CD577515.1         |               | 3.8  |     | 3.3  | cuticle protein               |
| CUST_12666_PI426302897 | Afun012666         | AGAP002429-PA | 3.7  |     | 3.8  | cytochrome p450               |
| CUST_7722_PI426302897  | Afun007722         | AGAP009850-PA | 3.6  |     | 2.8  | abc transporter               |
| CUST_5005_PI406199798  | AGAP003680-RA      | AGAP003680-RA | 3.5  |     | 3.4  | abc transporter               |
| CUST_574_PI406199772   | EE589639.1         |               | 3.2  |     | 5.4  | d7-related 1 protein          |
| CUST_4392_PI426302897  | Afun004392         | AGAP008213-PA | 2.7  |     | 2.6  | cytochrome p450               |
| CUST_143_PI426302897   | Afun000143         | AGAP000818-PA | 2.4  |     | 2.7  | cytochrome p450 cyp9k1        |
| CUST_13218_PI426302897 | Afun013218         | AGAP000284-PA | 2.3  |     | 2.3  | cytochrome p450               |
| CUST_10836_PI426302897 | Afun010836         | AGAP006228-PA | 2.3  |     | 3.7  | esterase b1                   |
| CUST_45_PI426302897    | Afun000045 (GSTe2) | AGAP009194-PA | 2.1  |     | 12.2 | glutathione-s-transferase gst |
| CUST_13870_PI426302897 | Afun013870         | AGAP012697-PA | 14.8 | 7.5 |      | sulfotransferase              |
| CUST_12777_PI426302897 | Afun012777         | AGAP009246-PA | 10.3 | 2.1 |      | cytochrome p450               |
| CUST_9_PI426302915     | CYP6M4.seq         |               | 9.2  | 5.3 |      | cytochrome p450               |
| CUST_9492_PI426302897  | Afun009492         | AGAP001722-PA | 8.8  | 5.9 |      | carboxylesterase              |
| CUST_15523_PI426302897 | Afun015523         | AGAP010581-PA | 5.7  | 3.1 |      | abc transporter               |

|                        |                       |                   |      |      |                         |
|------------------------|-----------------------|-------------------|------|------|-------------------------|
| CUST_979_PI426302897   | Afun000979            | AGAP006711-PA     | 4.5  | 3.7  | chymotrypsin 1          |
| CUST_1149_PI406199772  | EE590022.1            |                   | 4.4  | 2.4  | d7-related 1 protein    |
| CUST_3836_PI406199772  | CD577459.1            |                   | 4.3  | 3.6  | cuticle protein         |
| CUST_13272_PI406199769 | combined_c6791        |                   | 4.2  | 4.8  | cytochrome p450         |
| CUST_3830_PI406199772  | CD577462.1            |                   | 4.2  | 2.7  | cuticle protein         |
| CUST_11963_PI426302897 | Afun011963            | AGAP006220-PA     | 4.0  | 2.8  | aldehyde oxidase        |
| CUST_4920_PI406199772  | BU038983.1            |                   | 3.8  | 2.6  | cuticle protein         |
| CUST_1150_PI406199772  | EE590022.1            |                   | 3.7  | 2.3  | d7-related 1 protein    |
| CUST_13273_PI406199769 | combined_c6791        |                   | 3.6  | 4.2  | cytochrome p450         |
| CUST_7_PI426302915     | CYP6M3.seq            |                   | 2.9  | 10.1 | cytochrome p450         |
| CUST_1687_PI406199772  | EE589439.1            |                   | 2.9  | 5.7  | d7-related 1 protein    |
| CUST_7127_PI426302897  | Afun007127            | AGAP009241-PA     | 2.6  | 2.4  | cytochrome p450         |
| CUST_7008_PI426302897  | Afun007008            | AGAP012156-PA     | 2.6  | 2.2  | ABC transporter         |
| CUST_5935_PI406199769  | combined_c3002        |                   | 2.4  | 2.7  | superoxide dismutase    |
| CUST_7482_PI426302897  | Afun007482            | AGAP002693-PA     | 2.4  | 2.3  | ABC transporter         |
| CUST_12478_PI426302897 | Afun012478            | AGAP005757-PA     | 2.2  | 3.1  | carboxylesterase        |
| CUST_7696_PI406199798  | AGAP008141-<br>RA__3R | AGAP008141-<br>RA | 2.2  | 8.5  | argininosuccinate lyase |
| CUST_3394_PI426302897  | Afun003394            | AGAP000284-PA     | 2.1  | 2.4  | cytochrome p450         |
| CUST_7499_PI426302897  | Afun007499 (GSTD1-5)  | AGAP004164-PA     | 2.1  | 2.9  | glutathione transferase |
| CUST_27_PI406199775    | CYP6P9a               |                   | 39.4 | 4.3  | cytochrome p450         |
| CUST_30_PI406199775    | CYP6P9b               |                   | 24.0 | 4.1  | cytochrome p450         |
| CUST_25_PI406199775    | CYP6P9a               |                   | 16.3 | 3.4  | cytochrome p450         |
| CUST_1096_PI406199769  | combined_c557         |                   | 11.8 | 3.8  | trypsin                 |
| CUST_26_PI406199775    | CYP6P9a               |                   | 9.8  | 2.7  | cytochrome p450         |
| CUST_13614_PI426302897 | Afun013614            | AGAP003446-PA     | 8.3  | 4.0  | zinc finger protein 616 |
| CUST_13328_PI426302897 | Afun013328            | AGAP000384-PA     | 8.0  | 2.2  | zinc finger protein 650 |
| CUST_8241_PI406199769  | combined_c4173        |                   | 4.8  | 3.7  | glycoprotein 93         |

|                        |               |               |     |     |                           |
|------------------------|---------------|---------------|-----|-----|---------------------------|
| CUST_200_P1426302897   | Afun000200    | AGAP004038-PA | 3.5 | 2.2 | chorion peroxidase        |
| CUST_1823_P1406199769  | combined_c920 |               | 3.4 | 9.4 | glutathione-s-transferase |
| CUST_431_P1406199788   | gb-CYP6M3     |               | 2.9 | 2.6 | cytochrome p450           |
| CUST_10614_P1426302897 | Afun010614    | AGAP006380-PA | 2.5 | 3.0 | ABC transporter           |
| CUST_1182_P1406199772  | EE589982.1    |               | 2.3 | 2.4 | d7-related 1 protein      |
| CUST_7646_P1426302897  | Afun007646    | AGAP006225-PA | 2.0 | 4.0 | aldehyde oxidase          |

---

**Table S3:** Summary statistics for polymorphism of *CYP6P9a* and *CYP6P9b* between the FANG susceptible and the resistant strains from Malawi and Mozambique

| Samples        | N  | S  | h  | Syn | Nonsyn | $\pi$ (k)        | D (Tajima)           | D* (Fu and Li)      |
|----------------|----|----|----|-----|--------|------------------|----------------------|---------------------|
| <i>CYP6P9a</i> |    |    |    |     |        |                  |                      |                     |
| Uganda Alive   | 14 | 41 | 7  | 26  | 8      | 0.008<br>(16.05) | 1.07 <sup>ns</sup>   | 1.4 <sup>*</sup>    |
| Uganda dead    | 12 | 15 | 8  | 8   | 6      | 0.0024 (4.8)     | -0.14 <sup>ns</sup>  | -0.44 <sup>ns</sup> |
| All Uganda     | 26 | 50 | 15 | 30  | 14     | 0.0061<br>(12.1) | -0.35 <sup>ns</sup>  | 0.88 <sup>ns</sup>  |
| Malawi         | 20 | 13 | 5  | 4   | 2      | 0.001(1.98)      | -1.65 <sup>ns</sup>  | -1.98 <sup>ns</sup> |
| Total          | 46 | 61 | 20 | 33  | 16     | 0.01(20.1)       | 1.4 <sup>ns</sup>    | 0.05 <sup>ns</sup>  |
| <i>CYP6P9b</i> |    |    |    |     |        |                  |                      |                     |
| Uganda Alive   | 16 | 42 | 2  | 22  | 7      | 0.003(5.25)      | -2.45 <sup>***</sup> | -3.5 <sup>**</sup>  |
| Uganda dead    | 14 | 43 | 3  | 23  | 7      | 0.0029<br>(6.26) | -2.34 <sup>***</sup> | -3.1 <sup>**</sup>  |
| All Uganda     | 30 | 45 | 4  | 25  | 7      | 0.003 (5.5)      | -1.89 <sup>*</sup>   | 1.19 <sup>ns</sup>  |
| Malawi         | 20 | 12 | 2  | 6   | 3      | 0.0007(1.2)      | -2.3 <sup>**</sup>   | -3.5 <sup>**</sup>  |
| Total          | 50 | 73 | 6  | 44  | 12     | 0.012(21.43)     | 0.98 <sup>ns</sup>   | 1.09 <sup>ns</sup>  |

N= number of sequences (n); S, number of polymorphic sites; Syn, Synonymous mutations; Nonsyn, Non-synonymous mutations;  $\pi$ , nucleotide diversity (k= mean number of nucleotide differences); Tajima's D and Fu and Li's D statistics, ns, not significant.
